# Supplementary material for: Quinone Pool, a Key Target of Plant Flavonoids Inhibiting Gram-Positive Bacteria
Source: MDPI journal article supplement (doi:10.3390/molecules28134972), 2023-06-24
Supplement: s1 [file s1]

## Supplementary Materials

[Figure S1](#). The HPLC-UV profiles of representative MK extract from *S. aureus* ATCC 25923.

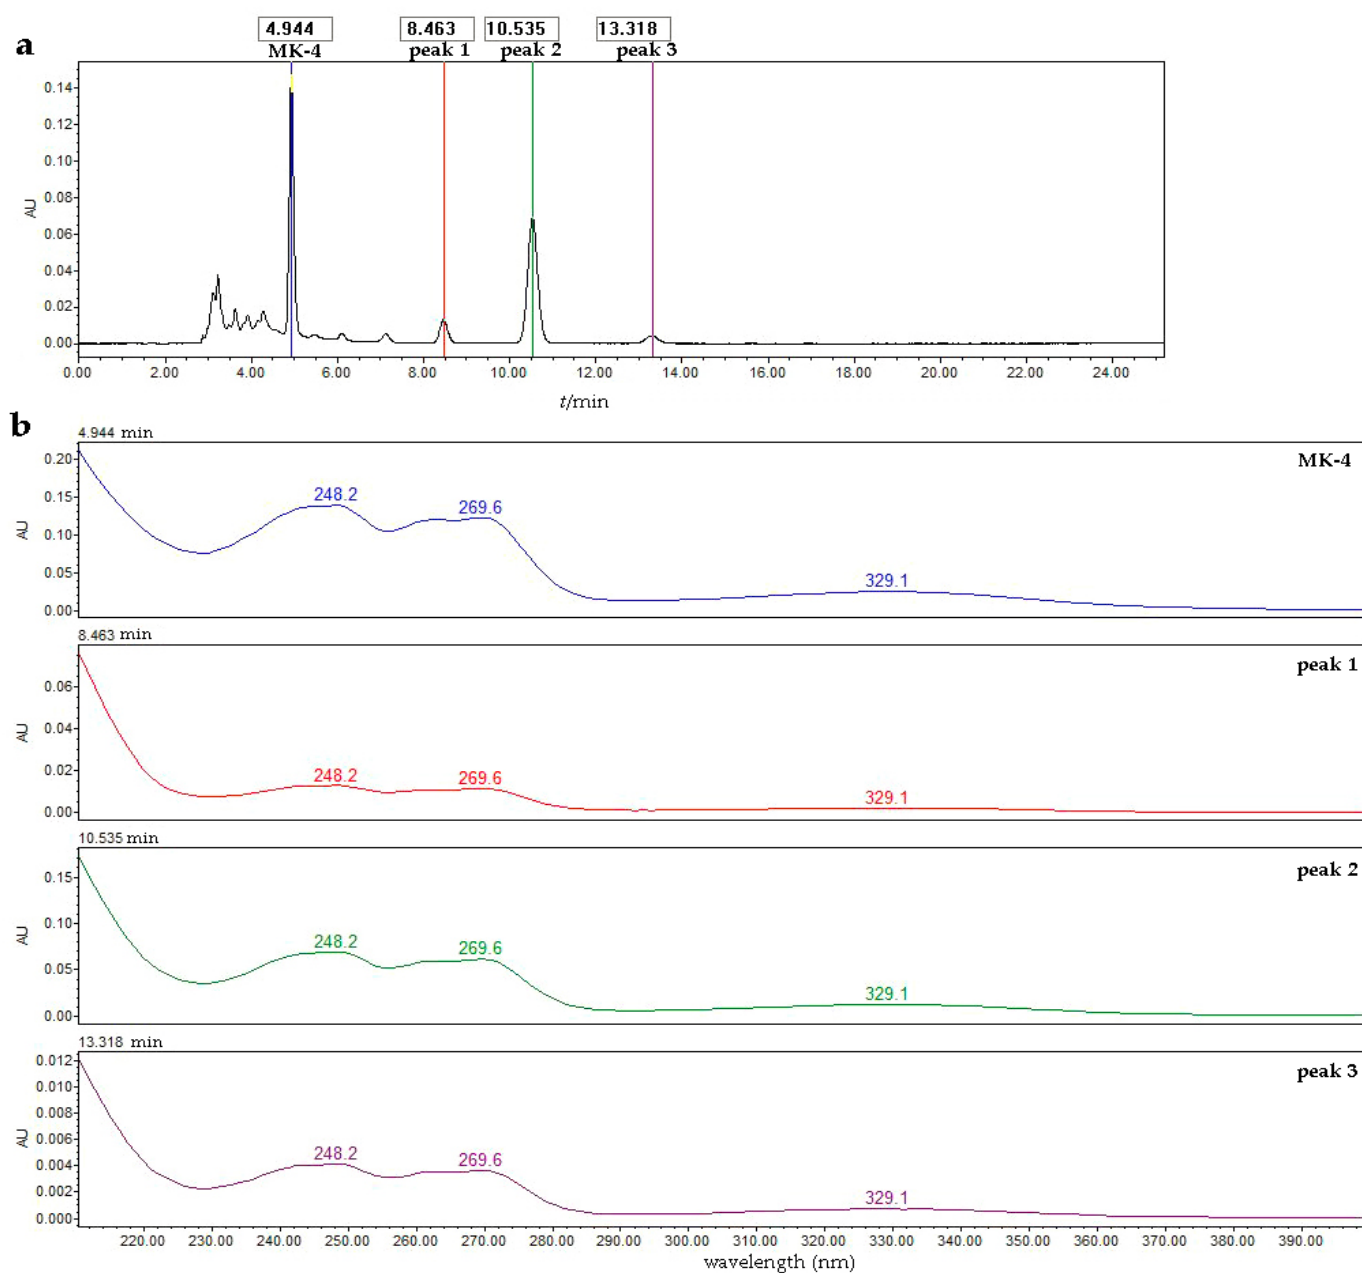

**Figure S1.** The HPLC-UV profiles of representative MK extract from *S. aureus* ATCC 25923. **a**, the HPLC of profile of MK extract; **b**, the UV spectroscopies of four peaks respectively at 4.944 (MK-4 as an internal standard), 8.363 (peak 1), 10.535 (peak 2) and 13.318 (peak 3).
